# Supplementary material for: Combined plasmonic Au-nanoparticle and conducting metal oxide high-temperature optical sensing with LSTO
Source: Royal Society of Chemistry journal article supplement (doi:10.1039/d0nr03306e), 2020-01-01
Supplement: d0nr03306e1.pdf [file d0nr03306e1.pdf]

## TEM Analysis of Gold-Nanoparticle Incorporated LSTO Films

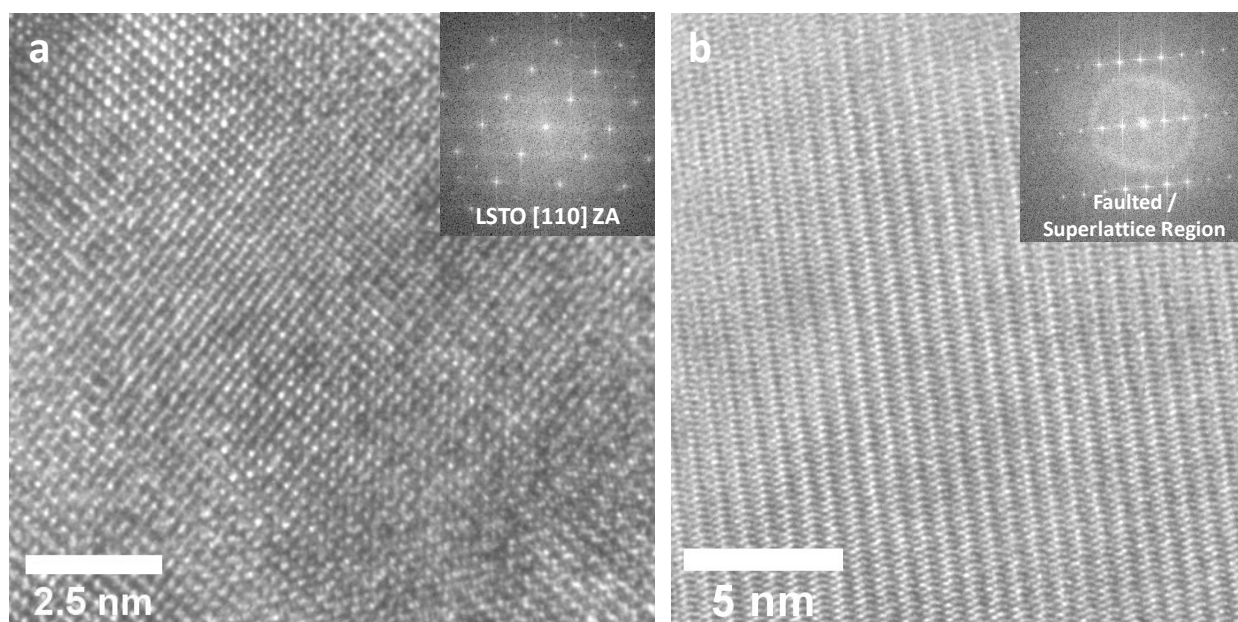

**Fig S1.** High-resolution TEM image of a) LSTO and b) a faulted / superlattice region that could not be indexed to perovskite LSTO.

## Optical Constant Fitting

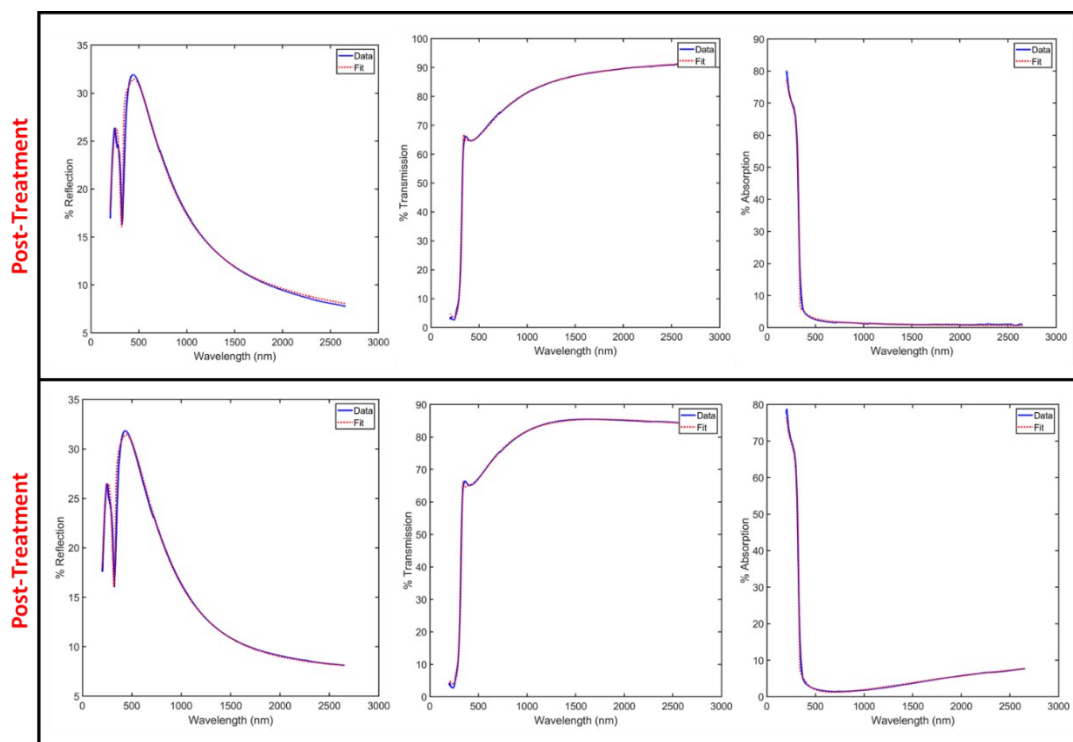

**Fig S2.** Fitting transmission, reflection, and absorption spectra of LSTO films before and after hydrogen treatment (10% H<sub>2</sub>, 16 hrs., 800°C).

| Fitting Parameter                                                 | Pre-Treatment                         | Post-Treatment         |
|-------------------------------------------------------------------|---------------------------------------|------------------------|
| <b>Band Gap (<math>E_g</math>)</b>                                | 3.50 eV                               | 3.50 eV                |
| <b>Oscillator Strength (A)</b>                                    | 49.7 eV                               | 43.5 eV                |
| <b>Oscillator Linewidth (C)</b>                                   | 2.50 eV                               | 2.64 eV                |
| <b>Oscillator Resonance (<math>E_0</math>)</b>                    | 3.79 eV                               | 3.97 eV                |
| <b>Transition Energy (<math>E_p</math>)</b>                       | 1.05 eV                               | 1.03 eV                |
| <b>High-frequency Diel. Const. (<math>\epsilon_\infty</math>)</b> | $2.44\epsilon_0$                      | $2.66\epsilon_0$       |
| <b>Plasma Frequency (<math>\omega_p</math>)</b>                   | $2.50 \times 10^{-3} \text{ fs}^{-1}$ | $1.10 \text{ fs}^{-1}$ |
| <b>Carrier Scattering Rate (<math>\tau^{-1}</math>)</b>           | $0.69 \text{ fs}^{-1}$                | $0.85 \text{ fs}^{-1}$ |
| <b>Urbach Energy (<math>E_u</math>)</b>                           | 1.28 eV                               | 0.89 eV                |
| <b>Urbach Tail Onset (<math>E_t</math>)</b>                       | 3.62 eV                               | 3.64 eV                |

**Table S1.** Summary of fitting parameters used in optical fits shown in Fig. S3.

| Hydrogen Concentration | Response Time (min) | Post-Treatment |
|------------------------|---------------------|----------------|
| 3%                     | 14.9                | 3.6            |
| 5%                     | 16                  | 5.6            |
| 10%                    | 10.2                | 7.8            |
| 30%                    | 12.3                | 9.5            |
| 50%                    | 8.1                 | 8.4            |
| 70%                    | 7.5                 | 9.8            |
| 100%                   | 9.8                 | 14             |

**Table S2.** Response and recovery times at 700°C, calculated based on time required to reach 90% of response or baseline, respectively. Time required for gas concentration to reach equilibrium may provide non-negligible contribution to response / recovery time, see discussion in main text for details.
